# Supplementary material for: Effects of an additive (hydroxyapatite–bentonite–biochar) on Cd and Pb stabilization and microbial community composition in contaminated vegetable soil
Source: Royal Society of Chemistry journal article supplement (doi:10.1039/d1ra00565k), 2021-01-01
Supplement: d1ra00565k1.pdf [file d1ra00565k1.pdf]

***Supporting Information***

**Effects of an additive (hydroxyapatite–bentonite–biochar) on Cd and Pb stabilization and microbial community composition in contaminated vegetable soil**

Di Zhang\*, Ting Li, Aifang Ding, Xiaoxia Wu

Nanjing XiaoZhuang University, Nanjing 211171, Peoples' Republic of China

\* Corresponding author:

Email: zhangdi@njxzc.edu.cn

**The specific methods for soil pH, SOC, available N, P and K were described as follows.**

Soil pH was determined using 1:2.5 (*w/v*) soil to water ratio and measured by pH meter (Orion Star™ A211, USA). SOC was determined by the potassium dichromate oxidation ( $K_2Cr_2O_7-H_2SO_4$ ) spectrophotometric method. The available nitrogen was determined by the alkali-diffusion method. The available phosphorus was measured by treatment with  $0.5 \text{ mol L}^{-1} NaHCO_3$  (pH 8.5) followed by molybdenum blue colorimetry method. The available potassium was measured by  $1 \text{ mol L}^{-1} NH_4OAc$  extraction-flame photometry.

**Descriptions of the European Community Bureau of Reference (BCR) sequential extraction method**

Briefly, step 1—acid-soluble fraction; 40 mL of  $0.11 \text{ mol L}^{-1}$  acetic acid (HAc) was added into in a 100-mL polyvinyl centrifuge tube already containing 1.0 g soil, and then shaken for 16 h to reach equilibrium. After that, the suspension was centrifuged at 4000 revolutions per minute (rpm) for 20 min. The supernatant was stored at 4 °C for further analysis. The soil pellet was washed with Milli-Q water and used for further extraction. Step 2—reducible fraction; 40 mL of  $0.1 \text{ mol L}^{-1}$  hydroxylamine hydrochloride ( $NH_2OH \cdot HCl$ , acidified at pH 2) for Fe/Mn-bound metal fraction was added in the residual soil pellet of step 1, and then shaken and centrifuged and the filtrate was stored at 4 °C. The soil pellet was washed with Milli-Q water and used for further extraction. Step 3—oxidizable fraction; 10 mL of 30% (*m/v*)  $H_2O_2$  was added into soil pellet and allowed standing for 1 h at 85°C on water bath. Another 10 mL of 30% (*m/v*)  $H_2O_2$  was used to digest sample at 85 °C. Then, the soil was extracted with 50 mL of  $1 \text{ mol L}^{-1}$  of ammonium acetate ( $NH_4OAc$ ) at pH 2 as described in step 1. After the third step, residual washed and air-dried soil was digested with the mixture of 10 mL  $HNO_3$ , 10 mL HF and 3 mL  $HClO_4$  to extract the final residual fraction.

## List of table

Table S1 Pearson correlation coefficients between soil physicochemical indexes and relative abundances of the most abundant phylum

| phylum                  | class                               | pH      | SOC    | N <sub>-available</sub> | P <sub>-available</sub> | K <sub>-available</sub> | Cd <sub>-available</sub> | Pb <sub>-available</sub> |
|-------------------------|-------------------------------------|---------|--------|-------------------------|-------------------------|-------------------------|--------------------------|--------------------------|
| <i>Proteobacteria</i>   | <i>α-Proteobacteria</i>             | -0.804* | -0.425 | -0.397                  | -0.224                  | -0.218                  | 0.769*                   | 0.745*                   |
|                         | <i>β-Proteobacteria</i>             | 0.583   | 0.356  | -0.139                  | -0.216                  | 0.175                   | -0.464                   | -0.471                   |
|                         | <i>γ-Proteobacteria</i>             | -0.796* | -0.564 | -0.472                  | -0.361                  | -0.385                  | 0.689*                   | 0.662*                   |
|                         | <i>δ-Proteobacteria</i>             | 0.347   | 0.291  | -0.185                  | 0.223                   | 0.147                   | -0.194                   | -0.242                   |
| <i>Acidobacteria</i>    | <i>Acidobacteria_Gp1</i>            | -0.445  | -0.141 | -0.156                  | -0.310                  | -0.295                  | 0.596*                   | 0.577*                   |
|                         | <i>Acidobacteria_Gp7</i>            | 0.709*  | 0.676* | 0.574*                  | 0.279                   | 0.130                   | -0.801*                  | -0.594*                  |
|                         | <i>Acidobacteria_Gp16</i>           | 0.846*  | 0.637* | 0.264                   | 0.129                   | -0.224                  | -0.849*                  | -0.570*                  |
|                         | <i>Holophagae</i>                   | -0.421  | -0.243 | -0.214                  | -0.335                  | -0.289                  | 0.454                    | 0.467                    |
| <i>Bacteroidetes</i>    | <i>Bacteroidetes_unclassified</i>   | 0.647*  | 0.337  | 0.283                   | 0.188                   | 0.292                   | -0.219                   | -0.158                   |
|                         | <i>Flavobacteria</i>                | 0.793*  | 0.558* | 0.377                   | 0.283                   | 0.214                   | -0.517*                  | -0.521*                  |
|                         | <i>Sphingobacteria</i>              | -0.524  | -0.225 | -0.216                  | -0.147                  | -0.138                  | 0.557*                   | 0.513                    |
| <i>Actinobacteria</i>   | <i>Actinobacteria</i>               | -0.749* | -0.524 | 0.378                   | 0.488                   | -0.501                  | 0.653*                   | 0.617*                   |
| <i>Chloroflexi</i>      | <i>Anaerolineae</i>                 | 0.327   | 0.368  | 0.429                   | 0.166                   | 0.271                   | -0.372                   | -0.368                   |
|                         | <i>Caldilineae</i>                  | 0.593   | 0.359  | 0.379                   | 0.105                   | 0.556*                  | -0.293                   | -0.452                   |
| <i>Gemmatimonadetes</i> | <i>Gemmatimonadetes</i>             | -0.474  | -0.305 | -0.298                  | -0.268                  | -0.159                  | 0.297                    | 0.272                    |
| <i>Nitrospirae</i>      | <i>Nitrospira</i>                   | -0.396  | -0.246 | -0.268                  | -0.391                  | -0.249                  | 0.428                    | 0.304                    |
| <i>Cyanobacteria</i>    | <i>Cyanobacteria</i>                | -0.238  | 0.252  | 0.152                   | 0.309                   | 0.169                   | -0.267                   | -0.180                   |
| <i>Firmicutes</i>       | <i>Bacilli</i>                      | 0.287   | 0.385  | 0.243                   | 0.364                   | 0.318                   | -0.389                   | -0.222                   |
|                         | <i>Clostridia</i>                   | 0.311   | 0.276  | 0.129                   | 0.216                   | 0.133                   | -0.264                   | -0.187                   |
| <i>Latescibacteria</i>  | <i>Latescibacteria_unclassified</i> | 0.728*  | 0.603* | 0.454                   | 0.378                   | 0.369                   | 0.243                    | 0.315                    |

SOC: Soil organic carbon; N<sub>-available</sub>: available nitrogen concentration; P<sub>-available</sub>: available phosphorus concentration; K<sub>-available</sub>: available potassium concentration; Cd<sub>-available</sub>: available cadmium concentration; Pb<sub>-available</sub>: available lead concentration. \* Correlation is significant at the 0.05 level.

## List of figure

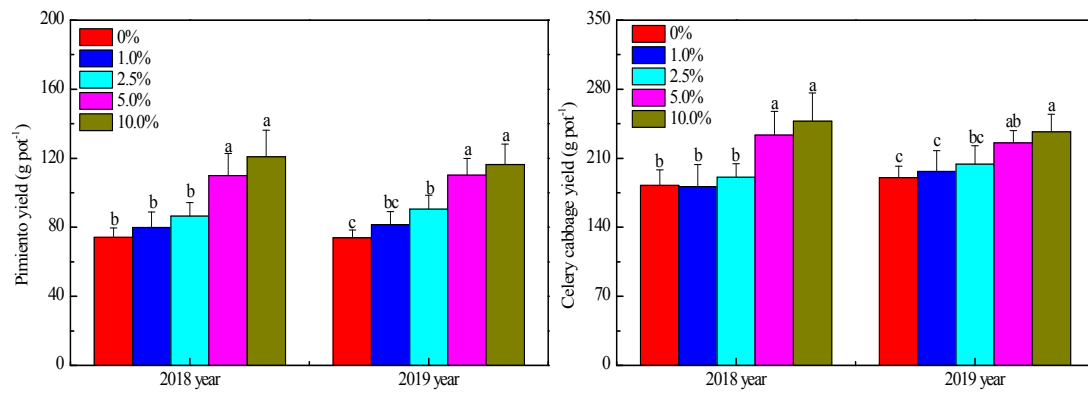

Fig. S1 Edible part yields of pimiento and celery cabbage in tested soil with different application rates of HTB. Values are mean  $\pm$  SD, and different lower case letters between bars indicate significant difference at  $p < 0.05$  level ( $n = 3$ , LSD test).
